# Supplementary material for: A green approach to prepare hierarchical porous carbon nanofibers from coal for high-performance supercapacitors
Source: Royal Society of Chemistry journal article supplement (doi:10.1039/c8ra08949c), 2019-01-01
Supplement: c8ra08949c1.pdf [file c8ra08949c1.pdf]

## Supplementary data

### **A green approach to prepare hierarchical porous carbon nanofibers from coal for high-performance supercapacitors**

Fenglian Tong, Wei Jia, Yanliang Pan, Jixi Guo,\* Lili Ding, Jingjing Chen, Dianzeng Jia\*

Key Laboratory of Energy Materials Chemistry, Ministry of Education; Key Laboratory of Advanced Functional Materials, Autonomous Region; Institute of Applied Chemistry, Xinjiang University, Urumqi, 830046, Xinjiang P. R. China. Email: [jxguo1012@163.com](mailto:jxguo1012@163.com); [jdz@xju.edu.cn](mailto:jdz@xju.edu.cn);  
Fax: +86-991-8588883; Tel: +86-991-8583083.

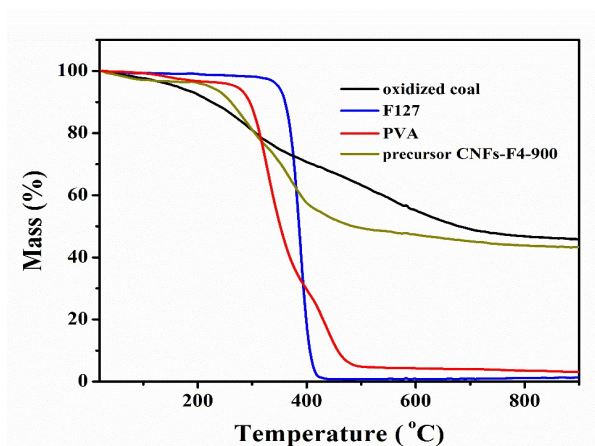

**Figure S1.** TG curves of oxidized coal, PVA, F127 and precursor CNFs-F4-900, respectively.

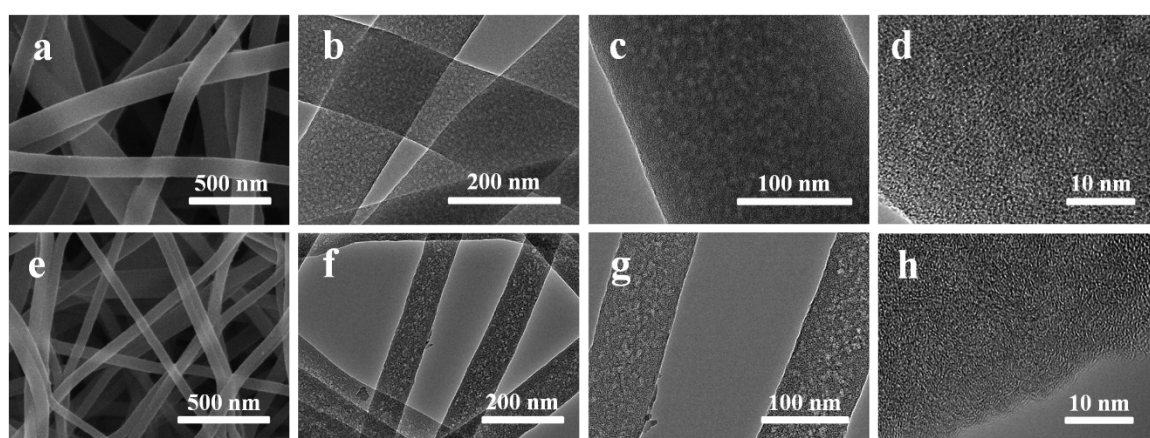

**Figure S2.** SEM images of HPCNFs (a) CNFs-F2-800; (e) CNFs-F2-1000; TEM images of HPCNFs (b, c) CNFs-F2-800; (f, g) CNFs-F2-1000; and HRTEM images of HPCNFs (d) CNFs-F2-800; (h) CNFs-F2-1000.

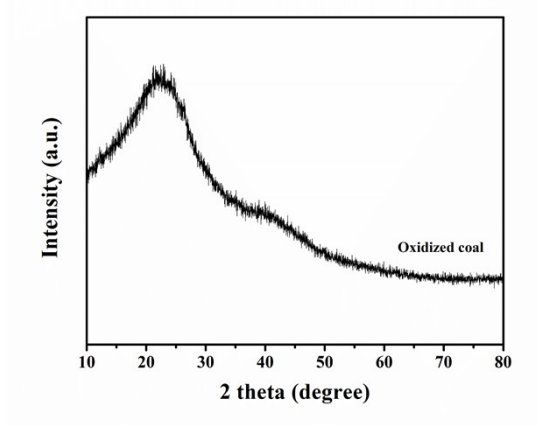

**Figure S3.** XRD patterns of oxidized coal.

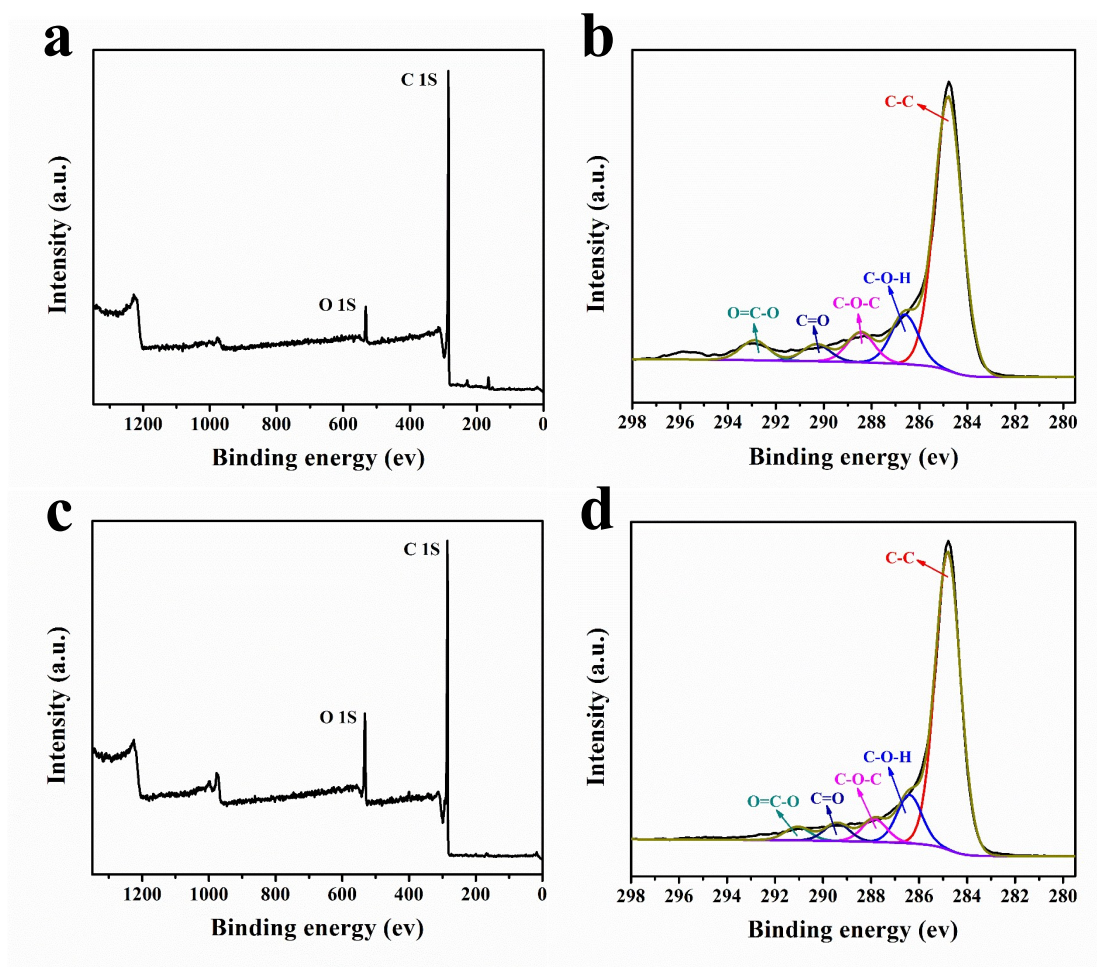

**Figure S4.** (a) XPS survey spectra, (b) XPS of C1s region of the CNFs-F2-800 and (c) XPS survey spectra, (d) XPS of C1s region of the CNFs-F2-1000.

**Table S1.** C, O and H contents evaluated from XPS elemental analysis.

| Samples      | Elemental Analysis |           |           |
|--------------|--------------------|-----------|-----------|
|              | C (wt. %)          | O (wt. %) | H (wt. %) |
| CNFs-F2-800  | 85.01              | 12.70     | 2.29      |
| CNFs-F2-900  | 88.51              | 10.33     | 1.16      |
| CNFs-F2-1000 | 93.96              | 5.40      | 0.64      |

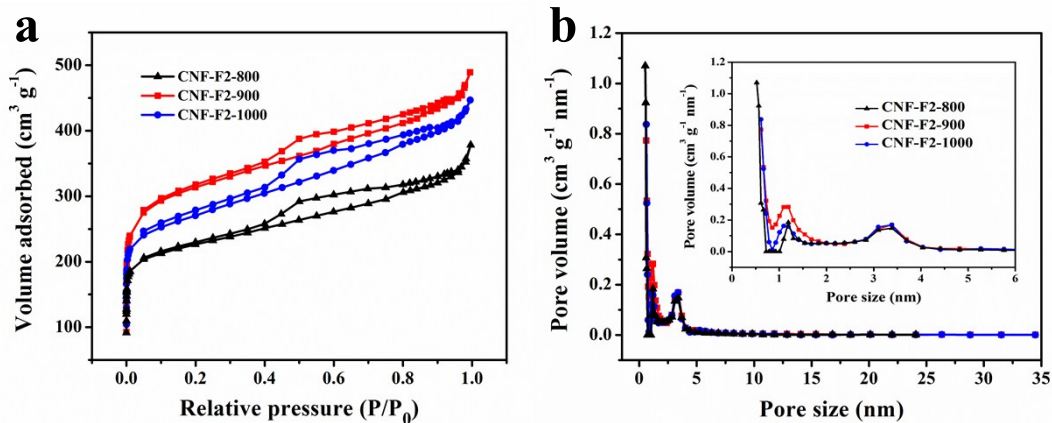

**Figure S5.** N<sub>2</sub> adsorption-desorption isotherms (a) and pore size distributions (b) of CNFs-F2-800, CNFs-F2-900 and CNFs-F2-1000.

**Table S2.** BET specific surface areas and porous structure of CNFs-F2-800, CNFs-F2-900 and CNFs-F2-1000.

| Sample       | $S_{\text{BET}}^{\text{a}}$<br>( $\text{m}^2 \text{g}^{-1}$ ) | $S_{\text{meso}}^{\text{b}}$<br>( $\text{m}^2 \text{g}^{-1}$ ) | $S_{\text{micro}}^{\text{c}}$<br>( $\text{m}^2 \text{g}^{-1}$ ) | $V_{\text{total}}^{\text{d}}$<br>( $\text{m}^3 \text{g}^{-1}$ ) | $V_{\text{meso}}^{\text{e}}$<br>( $\text{m}^3 \text{g}^{-1}$ ) | $V_{\text{micro}}^{\text{f}}$<br>( $\text{m}^3 \text{g}^{-1}$ ) | $D_{\text{ap}}^{\text{g}}$<br>(nm) |
|--------------|---------------------------------------------------------------|----------------------------------------------------------------|-----------------------------------------------------------------|-----------------------------------------------------------------|----------------------------------------------------------------|-----------------------------------------------------------------|------------------------------------|
| CNFs-F2-800  | 849                                                           | 399                                                            | 450                                                             | 0.42                                                            | 0.28                                                           | 0.14                                                            | 2.6                                |
| CNFs-F2-900  | 1161                                                          | 429                                                            | 733                                                             | 0.76                                                            | 0.45                                                           | 0.31                                                            | 2.7                                |
| CNFs-F2-1000 | 1007                                                          | 403                                                            | 604                                                             | 0.69                                                            | 0.44                                                           | 0.25                                                            | 2.7                                |

<sup>a</sup> BET surface area.

<sup>b</sup> Micropore surface area calculated using the V-t plot method.

<sup>c</sup> Mesopore surface area calculated using the V-t plot method.

<sup>d</sup> The total pore volume calculated by single point adsorption at  $P/P_0 = 0.99$ .

<sup>e</sup> The mesopore volume calculated using the V-t plot method.

<sup>f</sup> The micropore volume calculated using the V-t plot method.

<sup>g</sup> Average pore size.

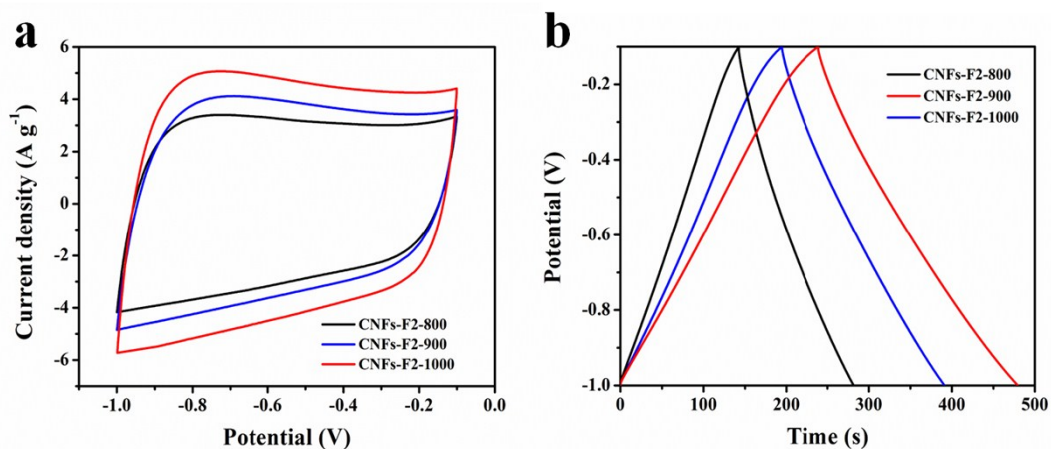

**Figure S6.** (a) CV curves of the samples at the scan rate of  $100 \text{ mV s}^{-1}$ ; (b) galvanostatic charge-discharge curves of the samples at the same scan rate of  $1.0 \text{ A g}^{-1}$ .

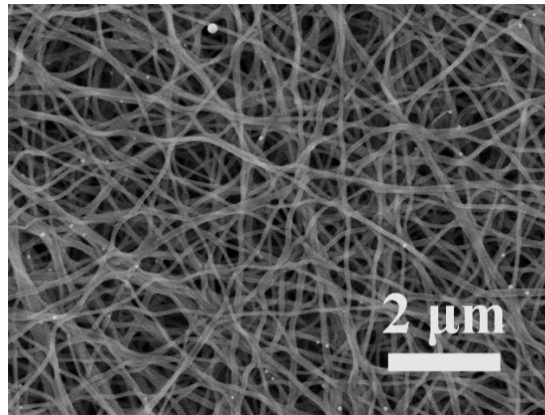

**Figure S7.** SEM characterizations of the CNFs-F2-900 electrode after 20000 discharge/charge cycles at 10.0 A g<sup>-1</sup>.

**Table S3.** Maximum capacitances and cycling stability of porous carbon nanofiber materials.

| Electrode Material                     |            |  | Specific Capacitance     | Electrolyte | cycling stability         | Reference |
|----------------------------------------|------------|--|--------------------------|-------------|---------------------------|-----------|
| water etching-assisted                 | templating |  | 195 F g <sup>-1</sup>    | 6 M KOH     | 91% 1 A g <sup>-1</sup>   | [18]      |
| activated mesoporous carbon nanofibers |            |  | at 1.0A g <sup>-1</sup>  |             | 3000 cycles               |           |
| porous carbon nanofibers               |            |  | 144 F g <sup>-1</sup>    | 6 M KOH     | 90% 0.5 A g <sup>-1</sup> | [21]      |
|                                        |            |  | at 0.1 A g <sup>-1</sup> |             | 1000 cycles               |           |
| hierarchical porous carbon nanofibers  |            |  | 251F g <sup>-1</sup>     | 6 M KOH     | 97% 2 A g <sup>-1</sup>   | [24]      |
|                                        |            |  | at 1.0 A g <sup>-1</sup> |             | 1000 cycles               |           |
| steam activated carbon nanofibers      |            |  | 230 F g <sup>-1</sup>    | 6 M KOH     | 88% 1 A g <sup>-1</sup>   | [13]      |
|                                        |            |  | at 1.0 A g <sup>-1</sup> |             | 5000 cycles               |           |
| coal derived porous carbon fibers      |            |  | 170 F g <sup>-1</sup>    | 6 M KOH     | 100% 1 A g <sup>-1</sup>  | [31]      |
|                                        |            |  | at 1.0 A g <sup>-1</sup> |             | 20000 cycles              |           |
| coal based porous carbon nanofibers    |            |  | 265.2 F g <sup>-1</sup>  | 6 M KOH     | 105% 10 A g <sup>-1</sup> | This work |
|                                        |            |  | at 1.0 A g <sup>-1</sup> |             | 20000 cycles              |           |

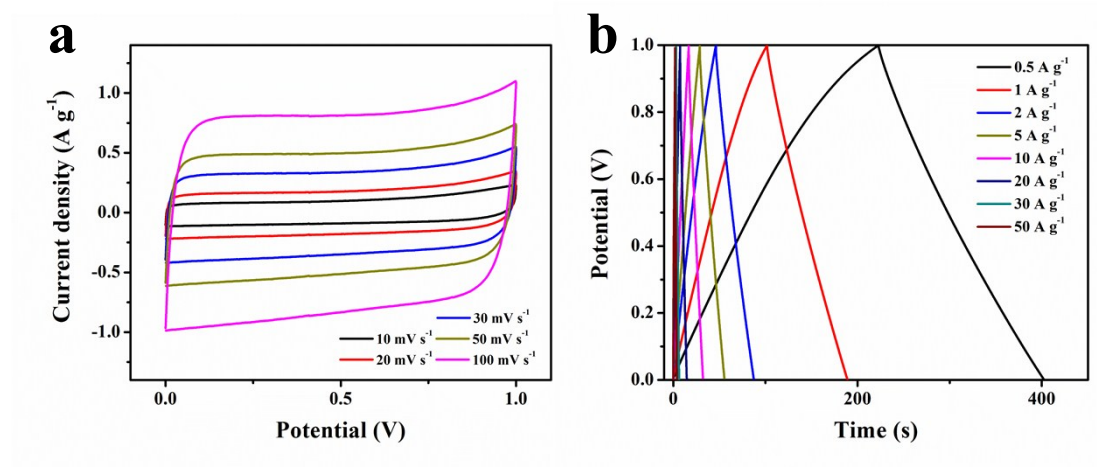

**Figure S8.** (a) CV curves and (b) CP cures of the CNFs-F2-900 sample at different current densities.
